# Supplementary material
Source: PubMed Central journal article supplement (PMC3889615)
Supplement: JB.01026-13_zjb999092930so1.pdf [file JB.01026-13_zjb999092930so1.pdf]

# 1 Supplemental Materials

TABLE S1. Primers used in this study

| Primer <sup>a</sup>    | Sequence (5'-3')           | Reference                        |
|------------------------|----------------------------|----------------------------------|
| <b>RPA primers</b>     |                            |                                  |
| cytoC553_G27_RPA_F     | GGTTATTGTGGCTTTAGG         | this study                       |
| cytoC553_RPA_R         | GGGATGTATTTGGCTAAAG        | this study                       |
| hydA_RPA_F             | GGTTGCACATGGCAGAATG        | this study                       |
| hydA_G27_RPA_R         | GCCTTCTACCATTA AAAATG      | this study                       |
| pfr-RPA-F              | GCGGCTGAAGAATACGAG         | (26)                             |
| pfr-RPA-R              | CTGATCAGCCAAATACAA         | (26)                             |
| serB_G27_RPA_F         | GCTATGAATGGCGAAACAG        | this study                       |
| serB_RPA_R             | CCCTGTAATGATTGGTCGC        | this study                       |
| <b>qRT-PCR primers</b> |                            |                                  |
| cyto c553_RT-F         | CGCAAACGCTTTAATGGCAACCGA   | this study                       |
| cyto c553_RT-R         | CAGGATTCTTGTGGCACCGCTTT    | this study                       |
| hydA_RT-F              | ATTGAAATGGGCGGGCATGATGAG   | this study                       |
| hydA_RT-R              | TGCCATGTGCAACCAAATCACAGG   | this study                       |
| pfr_RT-F               | TGAGCATGAGTTCTTGGTGC       | (Gilbreath, et al.) <sup>b</sup> |
| pfr_RT-R               | TTAAACCACATGCTCCACCGCTTG   | (Gilbreath, et al.) <sup>b</sup> |
| serB_RT-F              | GGCGTTTGATCTCATTAGCGCCTT   | this study                       |
| serB_RT-R              | AGCGTGTTACTGAAAGCCGCATCT   | this study                       |
| G27_16S RT-F           | ATGGATGCTAGTTGTTGGAGGGCT   | (15)                             |
| G27_16S RT-R           | TTAAACCACATGCTCCACCGCTTG   | (15)                             |
| <b>EMSA primers</b>    |                            |                                  |
| Cyto c553 EMSA-F       | ACCCATGCTTATTTTCATAGGAATTG | this study                       |
| Cyto c553 EMSA-R       | AGCCACAATAACCTTTTTCATCG    | this study                       |
| hydA_EMSA-F1           | CAGAGCTCCCGAACGCTTTGGC     | this study                       |
| hydA_EMSA-R            | TCATCGTAGAACATCGCCACTCC    | this study                       |
| pfr EMSA-F             | CCCCTTTTACCTAATTCTC        | (27)                             |
| pfr EMSA-R             | CCTTATTCAC TTGTTTCGTTTAG   | (27)                             |
| pfr EMSA MUT3-F        | CCCCTTTTACCTAATTTCGT       | this study                       |
| rpoB EMSA-F            | CCAAAGAGGGTAAAGAGAGCG      | (10)                             |
| rpoB EMSA-R            | CCTCTCCATCGCTTCTCTAAC      | (10)                             |
| serB_EMSA-F1           | GCCTATGAACATGAGCAACACATC   | this study                       |
| serB_EMSA-R1           | GGAGTCAAAATCAAAAACGGCTAG   | this study                       |

|                                         |                                          |            |
|-----------------------------------------|------------------------------------------|------------|
| serB_EMSA-F2                            | CAAAGGAGATACTATGTTATCAAAAGACATC          | this study |
| serB_EMSA-R2                            | GCATGCTCGTATTCTTCAGCC                    | this study |
| <b>Junctional PCR primers</b>           |                                          |            |
| hydAB_Jxn-F                             | TGGCCGATAAAGTCGGCACG                     | this study |
| hydAB_Jxn-R                             | CTTTGAGCGATGAATCCTGC                     | this study |
| hydBC_Jxn-F                             | AATCGCTGATTAAACCCAGCC                    | this study |
| hydBC_Jxn-R                             | ACCCCTTTATAAAAGCTGGAATTAGG               | this study |
| hydCD_Jxn-F                             | TCCCTGTGCATGTTTATATGG                    | this study |
| hydCD_Jxn-R                             | CATCTATAATATCCACGCTAGG                   | this study |
| hydDE_Jxn-F                             | AACGCTTTAGAAACAGCCC                      | this study |
| hydDE_Jxn-R                             | TGATCTCAGCGCTCGCTTGG                     | this study |
| pfr_serB_jxn-R                          | TCTGTCTCGCCATTCATAGC                     | this study |
| pfr_serB_jxn-F                          | TCTTGCAATGGTATGTGTCTG                    | this study |
| serB_fucT_jxn-F                         | GCATCAATGAGCCTAATTTAGCCC                 | this study |
| serB_fucT_jxn-R                         | CTGGCTGATCCAAGGGGATTGC                   | this study |
| <b>Primer Extension and TSS primers</b> |                                          |            |
| Cyto_c553 PE                            | GCCATTAAAGCGTTTGCGAACGCC                 | this study |
| Cyto_c553_TSS_map-F                     | AATCCAGGCATAACGCTTGAG                    | this study |
| Cyto_c553_TSS_map-R                     | CCTTTTTCATCGTTTGTCTCCTCTAC               | this study |
| hydA_PE                                 | GCGTTCTTCAATCTTTTGATAGGTC                | this study |
| hydA_TSS_map-F                          | CCCCCAGAGCTCCCGAACGC                     | this study |
| hydA_TSS_map-R                          | CATCGTAGAACATCGCCACTCC                   | this study |
| serB_PE                                 | CAGCATTGACTAGCGTGGAGTC                   | this study |
| <b><i>pfr</i>SOE primers</b>            |                                          |            |
| PFR_ApoMT_SOE_F                         | CTTTTTCATTA <b>gtgtgt</b> ATGCTATAATTATG | this study |
| PFR_ApoMT_SOE_R                         | CATAATTATAGCAT <b>acacac</b> TAATGAAAAAG | this study |
| PFR_PE                                  | CCTTATTCACTTGTTTCGTTTA                   | this study |
| PFR_ApoMT2_SOE_F                        | GGTGTTCCTTTC <b>gtgtgt</b> TTTGCAAG      | this study |
| PFR_ApoMT2_SOE_R                        | CTTGCAAA <b>acacac</b> GAAAGAACACC       | this study |
| <b>Footprinting primers</b>             |                                          |            |
| hydA_FAM_F                              | FAM-CAGAGCTCCCGAACGCTTTGGC               | this study |
| pfr_PE_FAM                              | FAM-CCTTATTCACTTGTTTCGTTTA               | this study |
| PFR_large_ftptng_F                      | GGTTAAATTGCCCTTTCG                       | this study |
| <b>FA primers</b>                       |                                          |            |

|                   |                                      |                                  |
|-------------------|--------------------------------------|----------------------------------|
| pfr-FA_LABEL      | 5FluorT/TCATTATCATTATGCTAT           | (Gilbreath, et al.) <sup>b</sup> |
| pfr-FA_UNLABELED  | TTCATTATCATTATGCTAT                  | this study                       |
| pfr-FA_COMPLEMENT | ATAGCATAAATGATAATGAA                 | (Gilbreath, et al.) <sup>b</sup> |
| pfr-FA_SCRAM-1    | TTCATT <b>Ag</b> <u>gtgt</u> ATGCTAT | (Gilbreath, et al.) <sup>b</sup> |
| pfr-FA-SCRAM-2    | ATAGCAT <b>acacac</b> TAATGAA        | (Gilbreath, et al.) <sup>b</sup> |

<sup>a</sup>Mutations in *apo*-Fur box are in bold, lowercase. FAM and FluorT labeling is as indicated.

<sup>b</sup>**Gilbreath JJ, Pich OQ, Benoit SL, Besold AN, Cha JH, Maier RJ, Michel SL, Maynard EL, Merrell DS.** 2013. Random and site-specific mutagenesis of the *Helicobacter pylori* ferric uptake regulator provides insight into Fur structure-function relationships. *Mol Microbiol* **89**:304-323.

2  
3  
4  
5  
6  
7  
8  
9  
10  
11  
12  
13  
14  
15  
16  
17

FIG. S1

DNase I footprinting of the *pfr* Large promoter fragment. A 3' end fluorescently labeled fragment of the *pfr* large promoter fragment was subjected to DNase I digestion in the absence and presence of *apo*-Fur (Panel A). Protected regions are those with reduced peak height and/or entirely missing peaks in the presence of *apo*-Fur (gray lines) as compared to digestion fragments in the absence of Fur (red lines). Protected regions are magnified in the boxed regions. The sequence of the *pfr* large promoter fragment utilized in the footprinting experiments is shown in Panel B. The conserved *apo*-Fur box sequences are in red, and the protected regions as identified through DNase I footprinting are given in blue (note that the second protected region does encompass the second AAATGA sequence, which is in red). The -10 and -35 promoter elements are shown in bold italics; the ATG start codon is in bold underlined text. The previously reported protected regions for the *pfr* promoter (5) are underlined.

A

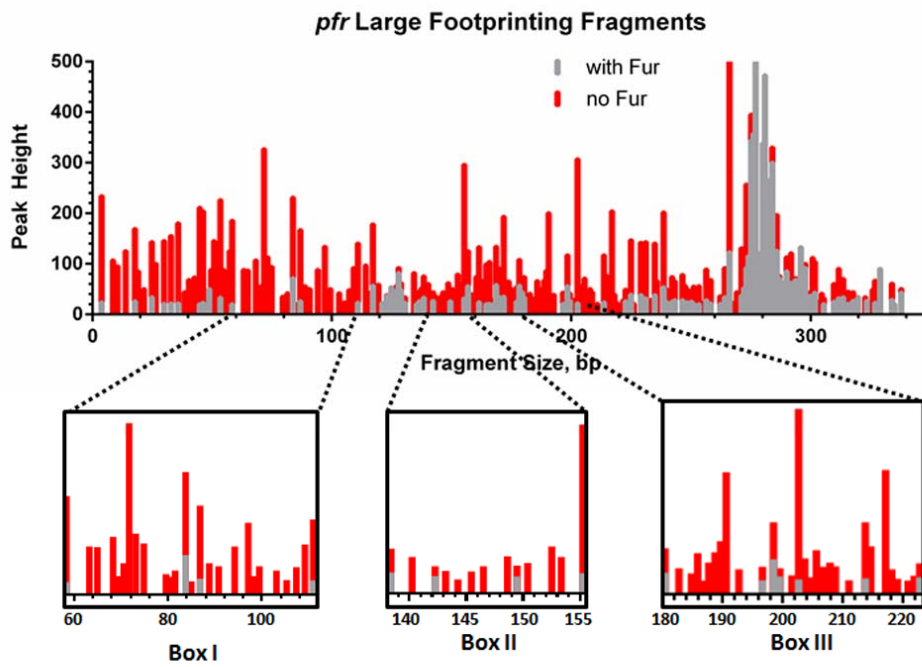

B

```

GGTTAAATGCCCCTTCGTTTTAAAGATAAACATTGTAGCATTTTTAGATTTAAGAATGCTTTTTATATATTATATAAAAA
TATCCCTTTTAAACCCCTAGTTGATACCAACCCCTTTTACCTAATTCCTAATAATAGATTTTATGATAAAATCTAAG
CTTTATCAAGCCATTAGCCGGTGTCTTTCATTTTTCGAAGTTTTAAAAATTTTCATACTCTTGTTTACTTTTCAT
TATCATTTATGCTATAATTATGGGCAACTTAAACCAACACAAGGAGATACTATGTTATCAAAGACATCATTAAGTTGC
TAAACGACAAGTGAATAAGG
    
```

19

20
